# Supplementary material
Source: Springer Nature journal article supplement (https://www.springermedizin.de/resource/supplementary/12967_2009_383_MOESM4_ESM.pdf/9576352)
Supplement: MOESM4 [file 9576352]

**A****Donor 9 (HLA-A\*1101/2402)**

E:T ratio Target cell

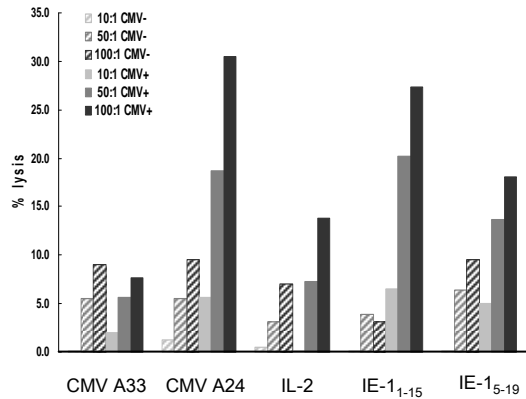**Peptides****B****Donor 10 (HLA-A\*0201/2402)**

E:T ratio, Target cell

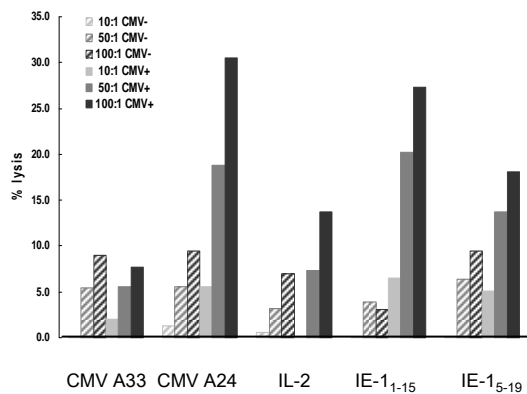**Peptides****C****Donor 11 (HLA-A\*2402/2402)**

E:T ratio, Target cell

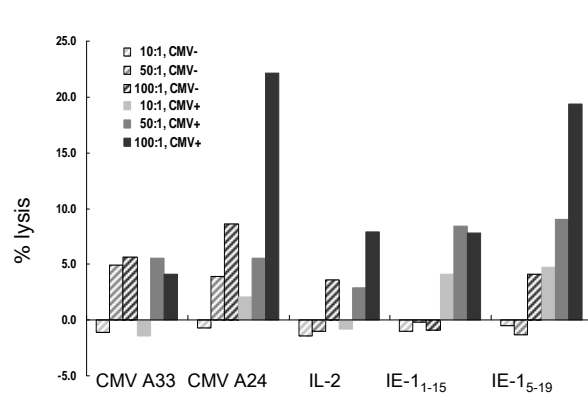**Peptides**
